# Supplementary figures and images for: Non–Small Cell Lung Cancers with Kinase Domain Mutations in the Epidermal Growth Factor Receptor Are Sensitive to Ionizing Radiation
Source: Oxford University Press journal article supplement (doi:10.1158/0008-5472.can-06-2627), 2006-10-01

Das, A. et al  
Supplemental Figure 1

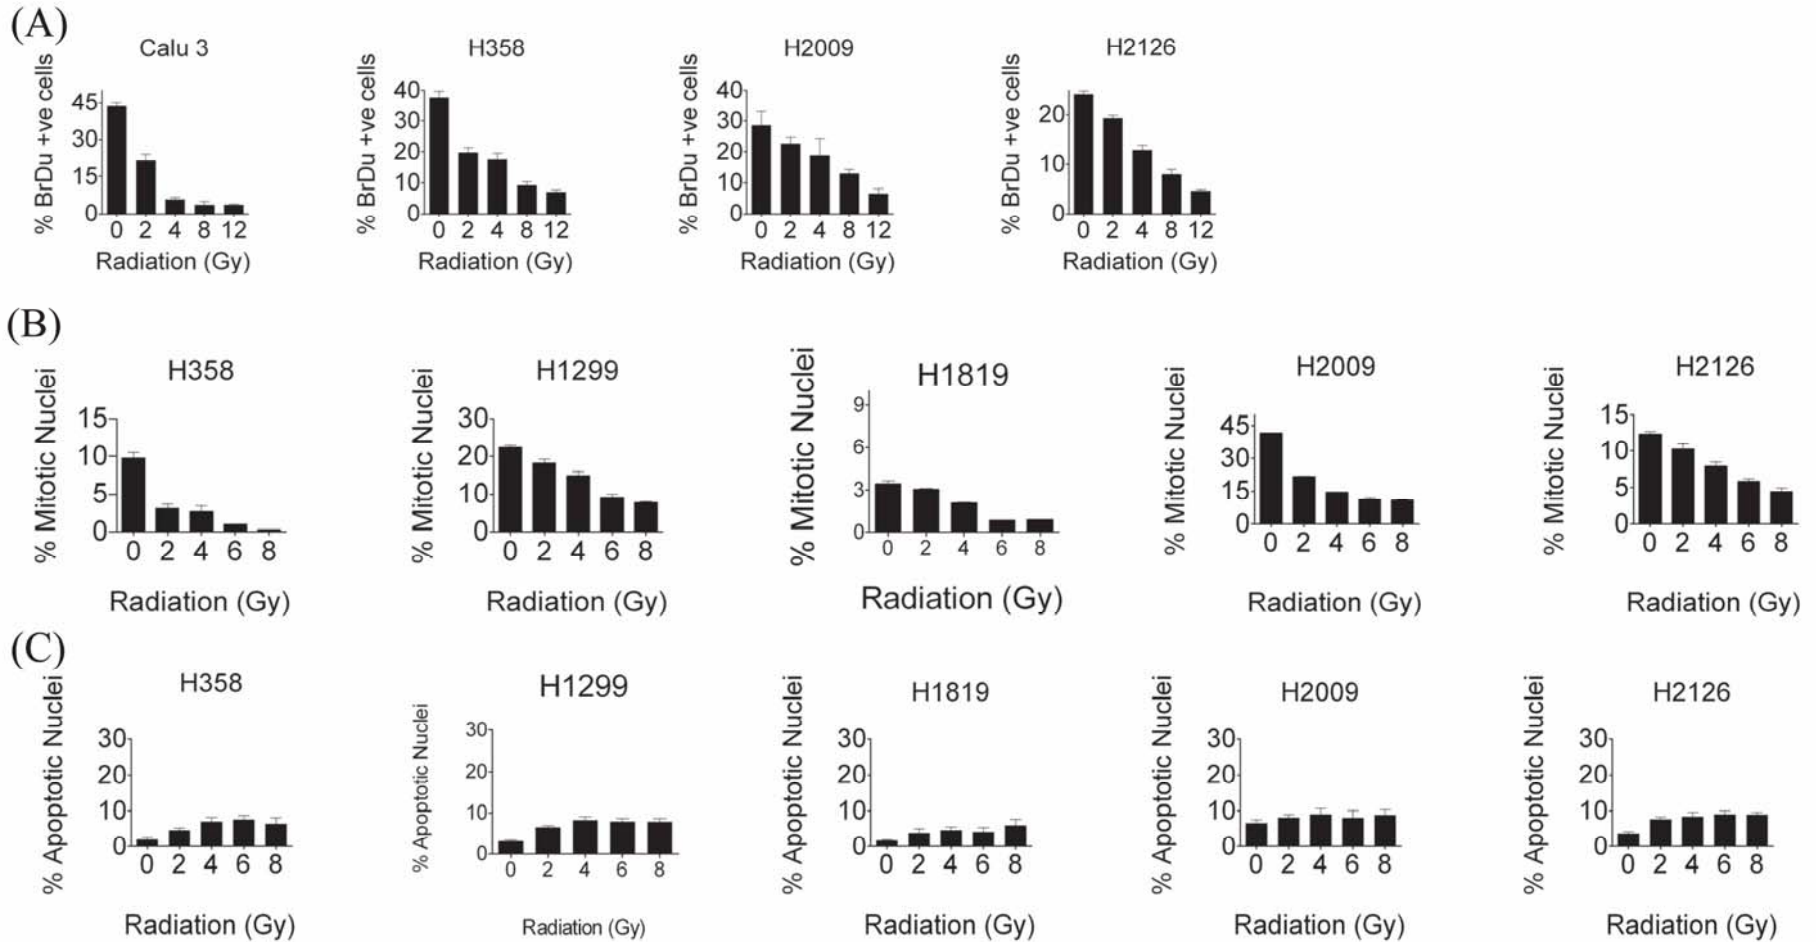

Supplement: 00085472can062627-sup-supplementary_figure_1.pdf [file 00085472can062627-sup-supplementary_figure_1.pdf]

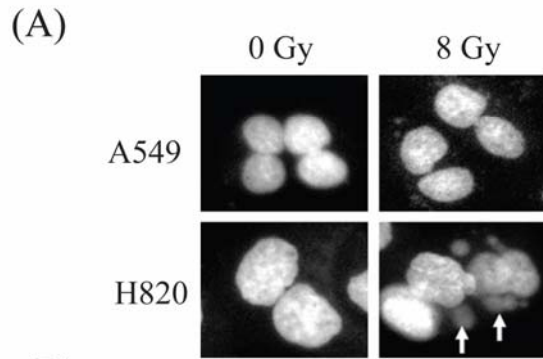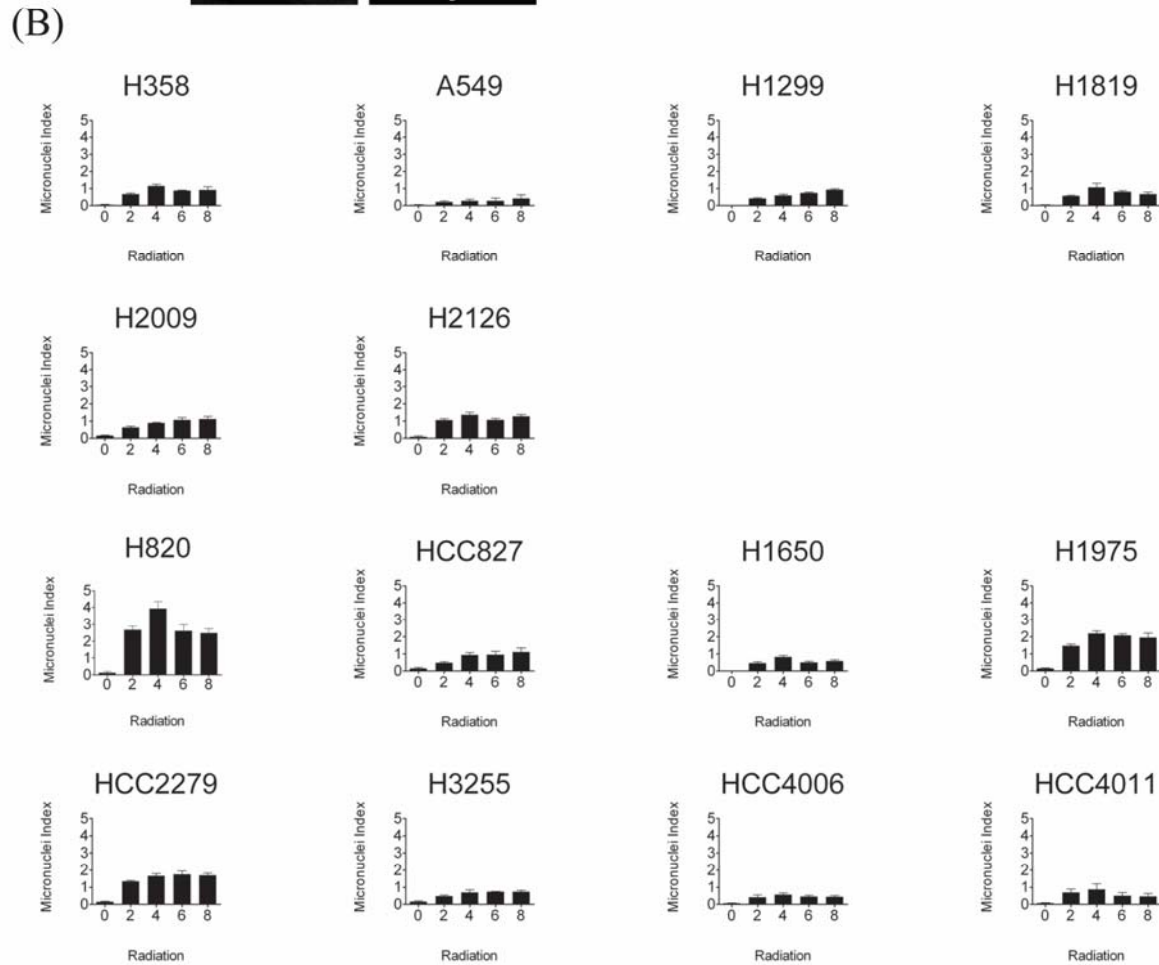

Supplement: 00085472can062627-sup-supplementary_figure_2.pdf [file 00085472can062627-sup-supplementary_figure_2.pdf]

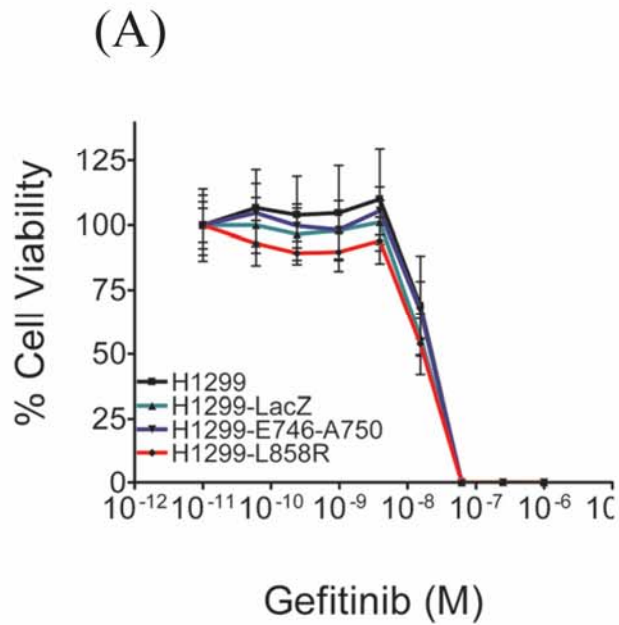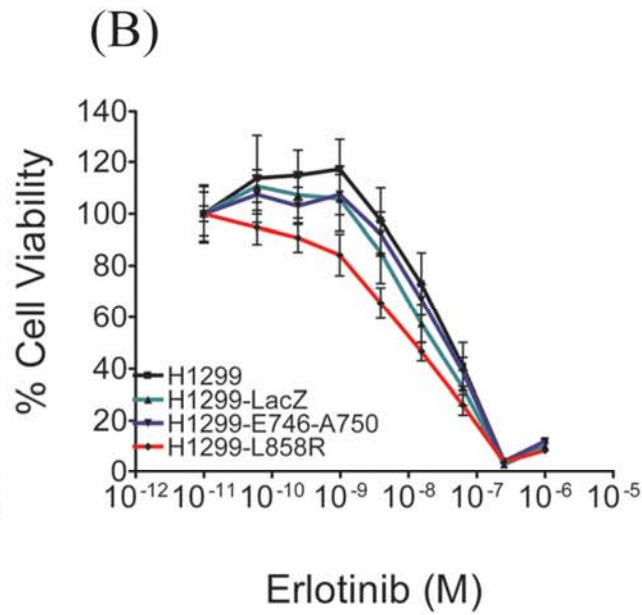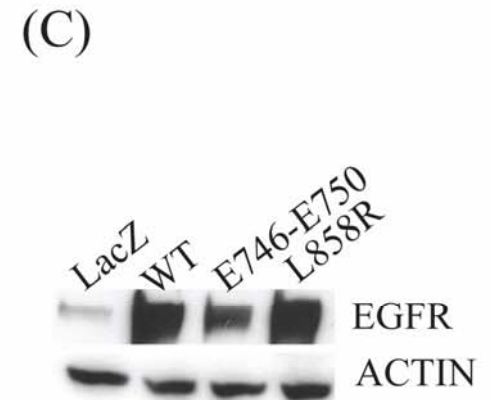

Supplement: 00085472can062627-sup-supplementary_figure_3.pdf [file 00085472can062627-sup-supplementary_figure_3.pdf]
